# Supplementary material for: Intraglomerular Monocyte/Macrophage Infiltration and Macrophage–Myofibroblast Transition during Diabetic Nephropathy Is Regulated by the A2B Adenosine Receptor
Source: MDPI journal article supplement (doi:10.3390/cells9041051), 2020-04-23
Supplement: s1 [file s1]

**Supplementary table 2.** List of the top dysregulated pathways analyzed using the Kyoto Encyclopedia of Genes and Genomes (KEGG) in glomeruli of MRS1754-treated DN rats.

| <b>PATHWAY</b>                            | <b>Dysregulated transcripts</b> | <b><i>p</i>-value</b> |
|-------------------------------------------|---------------------------------|-----------------------|
| Cell adhesion molecules (CAMs)            | 26                              | 3.6E-8                |
| Chemokine signaling pathway               | 21                              | 2.3E-4                |
| Focal adhesion                            | 21                              | 1.3E-3                |
| Natural killer cell mediated cytotoxicity | 20                              | 2.6E-7                |
| Regulation of actin cytoskeleton          | 18                              | 2.7E-2                |
| Complement and coagulation cascades       | 17                              | 1.6E-7                |
| Viral myocarditis                         | 17                              | 3.6E-6                |
| Leukocyte transendothelial migration      | 17                              | 1.3E-4                |
| Systemic lupus erythematosus              | 16                              | 2.5E-5                |
| Hematopoietic cell lineage                | 13                              | 3.6E-4                |
| Antigen processing and presentation       | 13                              | 1.1E-3                |
| Fc gamma R-mediated phagocytosis          | 12                              | 3.5E-3                |
| Vascular smooth muscle contraction        | 12                              | 2.2E-2                |
| Axon guidance                             | 12                              | 4.6E-2                |
| B cell receptor signaling pathway         | 11                              | 3.3E-3                |
| Toll-like receptor signaling pathway      | 11                              | 1.2E-2                |
| Type I diabetes mellitus                  | 10                              | 2.3E-3                |
