# Supplementary material for: Intraglomerular Monocyte/Macrophage Infiltration and Macrophage–Myofibroblast Transition during Diabetic Nephropathy Is Regulated by the A2B Adenosine Receptor
Source: MDPI journal article supplement (doi:10.3390/cells9041051), 2020-04-23
Supplement: s1 [file s1]

**Supplementary table 3.** List of the top Focal Adhesion and Cell Adhesion Molecules (CAMs) dysregulated transcripts in glomeruli of MRS1754-treated DN rats. Downregulated and upregulated genes are represented in red and blue respectively.

| GENBANK_ACCESSION | GENE NAME                                                    | logFC | p-value |
|-------------------|--------------------------------------------------------------|-------|---------|
| NM_001024244      | V-set domain containing T cell activation inhibitor 1(Vtcn1) | -6,42 | 0,01    |
| NM_001271081      | Leucine rich repeat containing 4B(Lrrc4b)                    | -6,10 | 0,02    |
| NM_019156         | Vitronectin(Vtn)                                             | -2,89 | 0,02    |
| NM_001191862      | Filamin C(Flnc)                                              | -2,70 | 0,01    |
| NM_001004084      | RT1 class II, locus Bb(RT1-Bb)                               | -2,61 | 0,00    |
| NM_001001717      | RT1 class Ib, locus M2(RT1-M2)                               | -2,6  | 0,00    |
| NM_001109890      | Protein tyrosine phosphatase, receptor type, C(Ptprc)        | -2,47 | 0,00    |
| NM_012705         | CD4 molecule(CD4)                                            | -2,43 | 0,00    |
| NM_183051         | RT1 class II, locus DOa(RT1-DOa)                             | -2,29 | 0,04    |
| NM_001047103      | Cell adhesion molecule 3(Cadm3)                              | -2,14 | 0,01    |
| NM_001033998      | Integrin subunit alpha L(Itgal)                              | -2,02 | 0,00    |
| NM_001271086      | Sialophorin(Spn)                                             | -1,97 | 0,00    |
| NM_012711         | Integrin subunit alpha M(Itgam)                              | -1,95 | 0,01    |
| NM_001100841      | Laminin subunit beta 3(Lamb3)                                | -1,95 | 0,03    |
| NM_001037780      | Integrin subunit beta 2(Itgb2)                               | -1,88 | 0,01    |
| NM_001107777      | Sialic acid binding Ig like lectin 1(Siglec1)                | -1,88 | 0,01    |
| NM_001008884      | RT1 class II, locus Db1(RT1-Db1)                             | -1,84 | 0,01    |
| NM_001130583      | Parvin, gamma(Parvg)                                         | -1,78 | 0,01    |
| NM_001008846      | RT1 class II, locus DOb(RT1-DOb)                             | -1,77 | 0,02    |
| NM_001008831      | RT1 class II, locus Ba(RT1-Ba)                               | -1,7  | 0,01    |
| NM_001008847      | RT1 class II, locus Da(RT1-Da)                               | -1,69 | 0,01    |
| NM_001013230      | Selectin P ligand(Selplg)                                    | -1,62 | 0,02    |
| NM_001107737      | Integrin subunit alpha 4(Itga4)                              | -1,61 | 0,02    |
| NM_138879         | Selectin E(Sele)                                             | -1,50 | 0,04    |
| NM_013171         | Integrin subunit beta 7(Itgb7)                               | -1,50 | 0,04    |
| NM_053304         | Collagen type I alpha 1 chain(Col1a1)                        | -1,41 | 0,04    |
| NM_001037336      | Leucine rich repeat containing 4(Lrrc4)                      | 1,49  | 0,03    |
| NM_001108726      | Integrin subunit beta 8(Itgb8)                               | 1,49  | 0,03    |
| NM_001013062      | Thrombospondin 1(Thbs1)                                      | 1,53  | 0,02    |
| NM_017345         | L1 cell adhesion molecule(L1cam)                             | 1,64  | 0,02    |
| NM_017198         | p21 (RAC1) activated kinase 1(Pak1)                          | 1,64  | 0,01    |
| NM_013117         | Collagen type XI alpha 1 chain(Col11a1)                      | 2,00  | 0,00    |
| NM_031699         | Claudin 1(Cldn1)                                             | 2,29  | 0,00    |
| NM_001033062      | Claudin 23(Cldn23)                                           | 2,36  | 0,01    |
| NM_001008832      | RT1 class I, locus1(RT1-CE1)                                 | 3,23  | 0,00    |
| NM_012929         | Collagen type II alpha 1 chain(Col2a1)                       | 3,45  | 0,00    |
| NM_001033986      | RT1 class I, locus CE5(RT1-CE5)                              | 3,69  | 0,00    |
| NM_133651         | Caveolin 1(Cav1)                                             | 6,74  | 0,00    |

**Supplementary table 4.** List of the top Chemokine Signaling Pathway and Leukocyte transendothelial migration dysregulated transcripts in glomeruli of MRS1754-treated DN rats. Downregulated and upregulated genes are represented in red and blue respectively.

| GENBANK<br>ACCESSION       | GENE NAME                                                                                     | logFC | p-<br>value |
|----------------------------|-----------------------------------------------------------------------------------------------|-------|-------------|
| NM_001008513               | C-C motif chemokine ligand 21(Ccl21)                                                          | -6,1  | 0,02        |
| NM_013025                  | C-C motif chemokine ligand 3(Ccl3)                                                            | -3,31 | 0,00        |
| NM_145672                  | C-X-C motif chemokine ligand 9(Cxcl9)                                                         | -3,08 | 0,01        |
| NM_001127304               | Neutrophil cytosolic factor 4(Ncf4)                                                           | -2,59 | 0,00        |
| NM_012759                  | vav guanine nucleotide exchange factor 1(Vav1)                                                | -2,42 | 0,00        |
| NM_024145                  | FGR proto-oncogene, Src family tyrosine kinase(Fgr)                                           | -2,26 | 0,00        |
| NM_012713,<br>NM_001172305 | Protein kinase C, beta(Prkcb)                                                                 | -2,23 | 0,00        |
| NM_133534                  | C-X3-C motif chemokine receptor 1(Cx3cr1)                                                     | -2,22 | 0,00        |
| NM_020542                  | C-C motif chemokine receptor 1(Ccr1)                                                          | -2,07 | 0,00        |
| NM_053396                  | Adenylate cyclase 7(Adcy7)                                                                    | -2,07 | 0,00        |
| NM_001004202               | Chemokine (C-C motif) ligand 6(Ccl6)                                                          | -2,01 | 0,00        |
| NM_001191923               | Phosphoinositide-3-kinase, regulatory subunit 5(Pik3r5)                                       | -1,97 | 0,01        |
| NM_053960                  | Chemokine (C-C motif) receptor 5(Ccr5)                                                        | -1,89 | 0,01        |
| NM_013185                  | HCK proto-oncogene, Src family tyrosine kinase(Hck)                                           | -1,77 | 0,01        |
| NM_001108978               | Phosphatidylinositol-4,5-bisphosphate 3-kinase, catalytic subunit delta(Pik3cd)               | -1,67 | 0,01        |
| NM_001008384               | ras-related C3 botulinum toxin substrate 2 (rho family, small GTP binding protein Rac2)(Rac2) | -1,63 | 0,02        |
| NM_053478                  | Phospholipase C, beta 2(Plcb2)                                                                | -1,59 | 0,03        |
| NM_001108248               | Wiskott-Aldrich syndrome(Was)                                                                 | -1,41 | 0,04        |
| NM_031005                  | Actinin, alpha 1(Actn1)                                                                       | 1,31  | 0,05        |
| NM_001107239               | Adenylate cyclase 1(Adcy1)                                                                    | 1,36  | 0,04        |
| NM_017198                  | p21 (RAC1) activated kinase 1(Pak1)                                                           | 1,64  | 0,01        |
| NM_031007                  | Adenylate cyclase 2(Adcy2)                                                                    | 2,04  | 0,01        |
| NM_031055                  | Matrix metalloproteinase 9(Mmp9)                                                              | 2,39  | 0,00        |
| NM_012605                  | Myosin light chain, phosphorylatable, fast skeletal muscle(Myhpf)                             | 5,95  | 0,02        |
| NM_001191065               | SHC adaptor protein 4(Shc4)                                                                   | 6,93  | 0,00        |
