# Supplementary material for: Intraglomerular Monocyte/Macrophage Infiltration and Macrophage–Myofibroblast Transition during Diabetic Nephropathy Is Regulated by the A2B Adenosine Receptor
Source: MDPI journal article supplement (doi:10.3390/cells9041051), 2020-04-23
Supplement: s1 [file s1]

**Supplementary table 5.** Flow cytometry analysis of mean percent of Macrophages (CD68+) or Myofibroblasts ( $\alpha$ -SMA+) positives and negatives for  $\alpha$ -SMA or CD68 markers in the glomeruli of Ctrl, DM+Veh and DM+MR1754 rats.

| <b>Group</b> | <b>CD68+ (%)</b>                |                                 | <b><math>\alpha</math>-SMA+(%)</b> |              |
|--------------|---------------------------------|---------------------------------|------------------------------------|--------------|
|              | <b><math>\alpha</math>-SMA+</b> | <b><math>\alpha</math>-SMA-</b> | <b>CD68+</b>                       | <b>CD68-</b> |
| Ctrl         | 77,628                          | 22,371                          | 99,063                             | 0,936        |
| DM+Veh       | 97,879                          | 2,120                           | 99,282                             | 0,717        |
| DM+MRS1754   | 71,259                          | 28,740                          | 99,174                             | 0,825        |
