# Supplementary material for: Intraglomerular Monocyte/Macrophage Infiltration and Macrophage–Myofibroblast Transition during Diabetic Nephropathy Is Regulated by the A2B Adenosine Receptor
Source: MDPI journal article supplement (doi:10.3390/cells9041051), 2020-04-23
Supplement: s1 [file s1]

**Supplementary table 1.** List of primers sequence used for RT-qPCR.

| Target               | Primers sequence                                           |
|----------------------|------------------------------------------------------------|
| Fn-1 mRNA            | Fw: AACAAACACTAATGTTAATTGCCCA<br>Rv: AGAGACATGCTTGTTCTCTGG |
| TGF- $\beta$ 1 mRNA  | Fw: GGAAATTGAGGGCTTTCGCC<br>Rv: CCGGTAGTGAACCCGTTGAT       |
| Col1 $\alpha$ 2 mRNA | Fw: CAAGGCATTCGTGGCGATA<br>Rv: ACCATGGTGACCAGCGATAC        |
| $\alpha$ -SMA mRNA   | Fw: CCGGGACTAAGACGGGAATC<br>Rv: TTGTCACACACCAAGGCAGT       |
| HPRT-1 mRNA          | Fw: CCCTGGCGTCGTGATTAGTG<br>Rv: CACCCTTTCCAAATCCTCAGC      |
